# Supplementary material for: Cooperative Stimulation of Megakaryocytic Differentiation by Gfi1b Gene Targets Kindlin3 and Talin1
Source: PubMed Central journal article supplement (PMC5074496; doi:10.1371/journal.pone.0164506), 2016-10-21

S2 Fig:

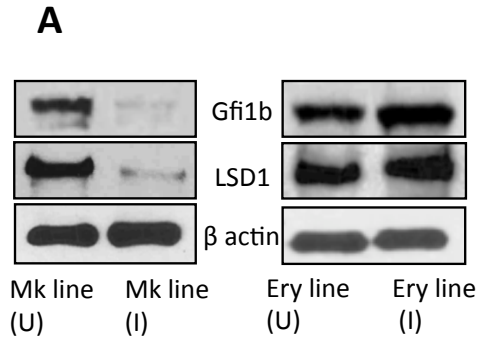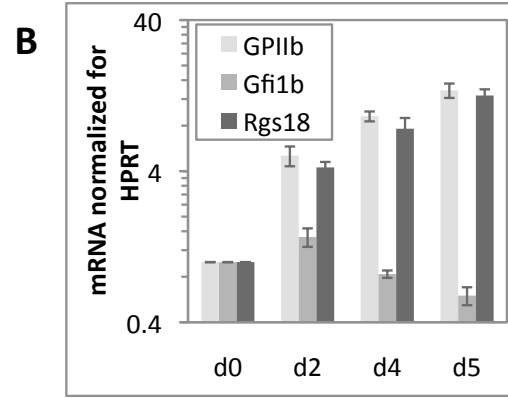

Supplement: pone.0164506.s002.pdf [file pone.0164506.s002.pdf]
