# Supplementary material for: Cooperative Stimulation of Megakaryocytic Differentiation by Gfi1b Gene Targets Kindlin3 and Talin1
Source: PubMed Central journal article supplement (PMC5074496; doi:10.1371/journal.pone.0164506), 2016-10-21
Supplement: pone.0164506.s004.pdf [file pone.0164506.s004.pdf]

## **Supporting Materials and Methods:**

### **ChIP-qPCR primers:**

Talin promoter site 1 (5'): CACAACCTTATCATTTCACACTCACC and GAGCTCAGTAAATCCTCTA

Talin promoter site 2 (3'): ACAAATCTCCGCTTTCCTCTAGC and TCCATTTGG GATATCTATG

Kindlin3 promoter: GGGGACTATATCGACTCTTCCTG and ACTCACTGATTTCTCCACGAT and

S<sub>μ</sub>: CTTGAGCCAAAATGAAGTAGACTGT and ACAGTCCAGTGTAGGCAGTAGAGTT.

### **Primers for expression vector construction:**

Talin1 (full length): ATGGTTGCGCTTTCGCTGAAGATT and GTGCTCGTCTCGAAGCTCTGAAG

Talin1 Head: ATGGTTGCGCTTTCGCTGAAGATT and CTGAAGGACTGTTGACTTTTT

Kindlin 3: ATGGCGGGTATGAAGACAGCCTCC and GAAGGCCTCATGGCCTCCTGTAAG

### **shRNA sequences:**

Kindlin3 shRNA1: CCGGGAGGAACCACAAATCCTGGTTCTCGAGAACCAGGATTTGTGGTTCCTCTTTTTTG

Kindlin3 shRNA2: CCGGGCTGGATAGTCTCACTACCATCTCGAGATGGTAGTGAGACTATCCAGCTTTTTTG

Talin1 shRNA1: CCGGGCCCATTGTAATCTCTGCTAACTCGAGTTAGCAGAGATTACAATGGGCTTTTTTG

Talin1 shRNA2: CCGGCGCTCCAAGAGTATTATTAATCTCGAGATTAATAATACTCTTGGAGCGTTTTTG

### **Primers for luciferase reporter construction:**

Talin1 promoter:

AATACGCGTACCTTGGGTCTCGCGGACATC and ATTCTCGAGGAAGGCGGAGAAGGATCCTCAGAA

Kindlin3 promoter : GGGTATGAAGACAGCCTCCGGG and TCCAGTTTCTGAGGGACTAACCT

### **qRT-PCR primers:**

Mouse Talin1: GAGAGCTGATGGAAGAAAAGAAAGA and AGCTTCTCCATCTTCTTTTCA TCTC

Mouse integrin b3: GCCATTATGTTTACAGAGGACATTT and CGTCACACACATAAGTACACACAGA

Human Kindlin3: ATC AAT CGCA AGC AGG ACT GGT and TGA GGA GGC GGC AGA TGG CAG CC

Human Talin1: GCTGAGCCCCGTCAGAACCTGC and ACACTCTGGCCTTGAGGACCAG
